# Supplementary material for: Gabapentinoids and Risk of Hip Fracture
Source: PubMed Central journal article supplement (PMC11561685; doi:10.1001/jamanetworkopen.2024.44488), 2024-11-13
Supplement: jamanetwopen-e2444488-s001.pdf [file jamanetwopen-e2444488-s001.pdf]

## Supplemental Online Content

Leung MTY, Turner JP, Marquina C, et al. Gabapentinoids and risk of hip fracture. *JAMA Netw Open*. 2024;7(11):e2444488. doi:10.1001/jamanetworkopen.2024.44488

**eTable 1.** Diagnostic codes for comorbidities

**eTable 2.** Characteristics of patients included and matched future-case controls for subgroup analyses for patients with low frailty risk (Hospital Frailty Risk Score [HFRS]<5), high frailty risk (HFRS $\geq$ 5), without chronic kidney disease (CKD) and with CKD

**eTable 3.** Characteristics of patients included and matched future-case controls for sensitivity analyses with exposure assessment period (index and reference periods) of 60 days and washout periods of 90, 120, 150, and 180 days

**eTable 4.** Characteristics of patients included and matched future-case controls for sensitivity analyses with exposure assessment period (index and reference periods) of 30 days and washout periods of 30, 60, and 90 days

**eTable 5.** Characteristics of patients included and matched future-case controls for sensitivity analyses with exposure assessment period (index and reference periods) of 30 days and washout periods of 120, 150, and 180 days

**eTable 6.** Characteristics of patients included and matched future-case controls for sensitivity analyses with exposure assessment period (index and reference periods) of 90 days and washout periods of 90, 120, 150, and 180 days

**eTable 7.** Results of case-case-time-control analyses for sensitivity analyses

This supplemental material has been provided by the authors to give readers additional information about their work.

**eTable 1.** ICD-10-AM codes for identification of comorbidities.

| <b>Comorbidity</b>                      | <b>ICD-10-AM</b>                                                                                      |
|-----------------------------------------|-------------------------------------------------------------------------------------------------------|
| Anxiety                                 | F40, F41                                                                                              |
| Arthritis                               | M00, M05, M06, M076, M13, M15-M19, M77.2                                                              |
| Alcohol use disorder                    | F10                                                                                                   |
| Cancer                                  | C00-C99                                                                                               |
| Cardiovascular disease                  | I00-I99                                                                                               |
| Cerebrovascular disease                 | I60-I69                                                                                               |
| Chronic kidney disease                  | N00-19, N25-N28, N39.1, N39.2, D59.3, B52.0, E85.3, Q60-Q63, T82.4, T86.1, Z49.0, Z94.0, Z99.2, U87.1 |
| COPD/ asthma                            | J40-J46                                                                                               |
| Delirium                                | F05                                                                                                   |
| Dementia                                | F00-F03, F10.7, F13.7, F18.7, F05.1, G30                                                              |
| Depression or other affective disorders | F32-F39                                                                                               |
| Diabetes mellitus                       | E10, E11, E13, E14, O24                                                                               |
| Epilepsy/seizures                       | G40, R56                                                                                              |
| Fall                                    | W00-W19                                                                                               |
| Gastroesophageal reflux disease         | K21                                                                                                   |
| Osteoporosis                            | M80-M82                                                                                               |
| Peptic ulcer disease                    | K25-K27                                                                                               |
| Previous vertebral fracture             | M484, S12, S220, S320, M8008                                                                          |
| Visual disturbances and blindness       | H53, H54                                                                                              |

**Abbreviation: ICD-10-AM,** International Statistical Classification of Diseases and Related Health Problems, Tenth Revision, Australian Modification

**eTable 2.** Characteristics of patients included and matched future-case controls for subgroup analyses for patients with low frailty risk (Hospital Frailty Risk Score [HFRS]<5), high frailty risk (HFRS≥5), without chronic kidney disease (CKD) and with CKD.

| Subgroup                    | Low frailty risk |             |       | High frailty risk |             |       | Without CKD |             |        | With CKD   |             |        |
|-----------------------------|------------------|-------------|-------|-------------------|-------------|-------|-------------|-------------|--------|------------|-------------|--------|
|                             | Cases            | Controls    | SMD   | Cases             | Controls    | SMD   | Cases       | Controls    | SMD    | Cases      | Controls    | SMD    |
| <b>Total, n</b>             | 1451             | 6953        |       | 1168              | 5502        |       | 1822        | 8814        |        | 793        | 3688        |        |
| <b>Age, n (%)</b>           |                  |             | 0.098 |                   |             | 0.114 |             |             | 0.063  |            |             | 0.146  |
| 50-59                       | 62 (4.3)         | 178 (2.6)   |       | 38 (3.3)          | 92 (1.7)    |       | 85 (4.7)    | 305 (3.5)   |        | 13 (1.6)   | 23 (0.6)    |        |
| 60-69                       | 170 (11.7)       | 776 (11.2)  |       | 106 (9.1)         | 435 (7.9)   |       | 205 (11.3)  | 968 (11.0)  |        | 70 (8.8)   | 226 (6.1)   |        |
| 70-79                       | 369 (25.4)       | 1777 (25.6) |       | 298 (25.5)        | 1401 (25.5) |       | 483 (26.5)  | 2343 (26.6) |        | 186 (23.5) | 857 (23.2)  |        |
| 80-84                       | 281 (19.4)       | 1391 (20.0) |       | 254 (21.7)        | 1262 (22.9) |       | 348 (19.1)  | 1724 (19.6) |        | 187 (23.6) | 927 (25.1)  |        |
| 85+                         | 569 (39.2)       | 2831 (40.7) |       | 472 (40.4)        | 2312 (42.0) |       | 701 (38.5)  | 3474 (39.4) |        | 337 (42.5) | 1655 (44.9) |        |
| <b>Sex, n (%)</b>           |                  |             | 0.035 |                   |             | 0.031 |             |             | 0.025  |            |             | 0.022  |
| Males                       | 369 (25.4)       | 1662 (23.9) |       | 376 (32.2)        | 1692 (30.8) |       | 450 (24.7)  | 2082 (23.6) |        | 289 (36.4) | 1305 (35.4) |        |
| Females                     | 1082 (74.6)      | 5291 (76.1) |       | 792 (67.8)        | 3810 (69.2) |       | 1372 (75.3) | 6732 (76.4) |        | 504 (63.6) | 2383 (64.6) |        |
| <b>HFRS, n (%)</b>          |                  |             | 0.018 |                   |             | 0.010 |             |             | 0.030  |            |             | 0.040  |
| <5                          | 518 (35.7)       | 2542 (36.6) |       | 943 (80.7)        | 4420 (80.3) |       | 1235 (67.8) | 6097 (69.2) |        | 211 (26.6) | 1047 (28.4) |        |
| ≥5                          | 933 (64.3)       | 4411 (63.4) |       | 225 (19.3)        | 1082 (19.7) |       | 587 (32.2)  | 2717 (30.8) |        | 582 (73.4) | 2641 (71.6) |        |
| <b>Comorbidities, n (%)</b> |                  |             |       |                   |             |       |             |             |        |            |             |        |
| Anxiety                     | 55 (3.8)         | 248 (3.6)   | 0.012 | 149 (12.8)        | 657 (11.9)  | 0.025 | 112 (6.1)   | 462 (5.2)   | 0.039  | 91 (11.5)  | 432 (11.7)  | 0.007  |
| Arthritis                   |                  | 1215 (17.5) |       |                   | 1391 (25.3) |       |             |             |        |            |             |        |
| Alcohol use disorder        | 249 (17.2)       | 79 (1.1)    | 0.008 | 288 (24.7)        | 281 (5.1)   | 0.014 | 350 (19.2)  | 1725 (19.6) | 0.009  | 187 (23.6) | 861 (23.3)  | 0.006  |
| Cancer                      | 27 (1.9)         | 1087 (15.6) | 0.060 | 69 (5.9)          | 1468 (26.7) | 0.035 | 58 (3.2)    | 245 (2.8)   | 0.024  | 38 (4.8)   | 163 (4.4)   | 0.018  |
| Cardiovascular disease      | 223 (15.4)       | 3456 (49.7) | 0.007 | 286 (24.5)        | 4642 (84.4) | 0.050 | 326 (17.9)  | 1566 (17.8) | 0.003  | 178 (22.4) | 859 (23.3)  | 0.020  |
| Cerebrovascular disease     | 679 (46.8)       | 445 (6.4)   | 0.058 | 987 (84.5)        | 842 (15.3)  | 0.004 | 977 (53.6)  | 4719 (53.5) | 0.002  | 684 (86.3) | 3215 (87.2) | 0.027  |
| Chronic kidney disease      | 87 (6.0)         | 1188 (17.1) | 0.017 | 182 (15.6)        | 2908 (52.9) | 0.008 | 145 (8.0)   | 725 (8.2)   | 0.010  | 123 (15.5) | 518 (14.0)  | 0.041  |
| COPD/ asthma                | 214 (14.7)       | 1098 (20.0) | 0.064 | 588 (50.3)        | 1604 (29.2) | 0.050 | (100.0)     | (100.0)     | <0.001 | (100.0)    | (100.0)     | <0.001 |
| Delirium                    | 122 (8.4)        | 595 (8.6)   | 0.005 | 250 (21.4)        | 468 (8.5)   | 0.036 | 185 (10.2)  | 783 (8.9)   | 0.043  | 183 (23.1) | 881 (23.9)  | 0.019  |
| Dementia                    | 78 (5.4)         | 407 (5.9)   | 0.021 | 343 (29.4)        | 1098 (20.0) | 0.005 | 185 (10.2)  | 920 (10.4)  | 0.009  | 234 (29.5) | 1021 (27.7) | 0.040  |
|                             | 25 (1.7)         | 109 (1.6)   | 0.012 | 91 (7.8)          | 1604 (29.2) | 0.026 | 57 (3.1)    | 293 (3.3)   | 0.011  | 58 (7.3)   | 287 (7.8)   | 0.018  |

|                                         |            |           |       |            |            |       |            |             |       |            |             |       |
|-----------------------------------------|------------|-----------|-------|------------|------------|-------|------------|-------------|-------|------------|-------------|-------|
| Depression or other affective disorders | 38 (2.6)   | 159 (2.3) | 0.021 | 133 (11.4) | 633 (11.5) | 0.004 | 89 (4.9)   | 418 (4.7)   | 0.007 | 83 (10.5)  | 381 (10.3)  | 0.004 |
|                                         |            | 1355      |       |            | 1952       |       |            |             |       |            |             |       |
| Diabetes mellitus                       | 284 (19.6) | (19.5)    | 0.002 | 412 (35.3) | (35.5)     | 0.004 | 318 (17.5) | 1605 (18.2) | 0.020 | 374 (47.2) | 1680 (45.6) | 0.032 |
| Epilepsy/seizures                       | 23 (1.6)   | 82 (1.2)  | 0.035 | 50 (4.3)   | 225 (4.1)  | 0.010 | 40 (2.2)   | 179 (2.0)   | 0.011 | 33 (4.2)   | 143 (3.9)   | 0.014 |
|                                         |            | 1152      |       |            | 3056       |       |            |             |       |            |             |       |
| Fall                                    | 250 (17.2) | (16.6)    | 0.018 | 621 (53.2) | (55.5)     | 0.048 | 514 (28.2) | 2435 (27.6) | 0.013 | 357 (45.0) | 1751 (47.5) | 0.049 |
| Gastroesophageal reflux disease         | 106 (7.3)  | 536 (7.7) | 0.015 | 152 (13.0) | 618 (11.2) | 0.055 | 162 (8.9)  | 790 (9.0)   | 0.003 | 94 (11.9)  | 413 (11.2)  | 0.021 |
|                                         |            | 1536      |       |            | 2184       |       |            |             |       |            |             |       |
| Osteoporosis                            | 312 (21.5) | (22.1)    | 0.014 | 455 (39.0) | (39.7)     | 0.015 | 481 (26.4) | 2426 (27.5) | 0.025 | 283 (35.7) | 1235 (33.5) | 0.046 |
| Peptic ulcer disease                    | 34 (2.3)   | 158 (2.3) | 0.005 | 64 (5.5)   | 279 (5.1)  | 0.018 | 44 (2.4)   | 199 (2.3)   | 0.010 | 52 (6.6)   | 185 (5.0)   | 0.066 |
| Previous vertebral fracture             | 31 (2.1)   | 134 (1.9) | 0.015 | 123 (10.5) | 731 (13.3) | 0.085 | 88 (4.8)   | 422 (4.8)   | 0.002 | 67 (8.4)   | 377 (10.2)  | 0.061 |
| Visual disturbances and blindness       | 28 (1.9)   | 136 (2.0) | 0.002 | 60 (5.1)   | 272 (4.9)  | 0.009 | 49 (2.7)   | 241 (2.7)   | 0.003 | 37 (4.7)   | 182 (4.9)   | 0.013 |

**Abbreviations:** COPD, chronic obstructive pulmonary disease; SMD, standardized mean difference

**eTable 3.** Characteristics of patients included and matched future-case controls for sensitivity analyses with exposure assessment period (index and reference periods) of 60 days and washout periods of 90, 120, 150, and 180 days.

| Washout period              | 90 days     |             |       | 120 days    |             |       | 150 days    |             |       | 180 days    |             |       |
|-----------------------------|-------------|-------------|-------|-------------|-------------|-------|-------------|-------------|-------|-------------|-------------|-------|
|                             | Cases       | Controls    | SMD   | Cases       | Controls    | SMD   | Cases       | Controls    | SMD   | Cases       | Controls    | SMD   |
| <b>Total, n</b>             | 2630        | 12846       |       | 2632        | 12844       |       | 2630        | 12852       |       | 2615        | 12786       |       |
| <b>Age, n (%)</b>           |             |             | 0.04  |             |             | 0.039 |             |             | 0.04  |             |             | 0.041 |
| 50-59                       | 110 (4.2)   | 442 (3.4)   |       | 111 (4.2)   | 448 (3.5)   |       | 112 (4.3)   | 451 (3.5)   |       | 113 (4.3)   | 453 (3.5)   |       |
| 60-69                       | 278 (10.6)  | 1350 (10.5) |       | 282 (10.7)  | 1359 (10.6) |       | 282 (10.7)  | 1365 (10.6) |       | 280 (10.7)  | 1369 (10.7) |       |
| 70-79                       | 669 (25.4)  | 3257 (25.4) |       | 663 (25.2)  | 3226 (25.1) |       | 653 (24.8)  | 3190 (24.8) |       | 657 (25.1)  | 3208 (25.1) |       |
| 80-84                       | 533 (20.3)  | 2646 (20.6) |       | 539 (20.5)  | 2672 (20.8) |       | 535 (20.3)  | 2652 (20.6) |       | 535 (20.5)  | 2652 (20.7) |       |
| 85+                         | 1040 (39.5) | 5151 (40.1) |       | 1037 (39.4) | 5139 (40.0) |       | 1048 (39.8) | 5194 (40.4) |       | 1030 (39.4) | 5104 (39.9) |       |
| <b>Sex, n (%)</b>           |             |             | 0.019 |             |             | 0.021 |             |             | 0.018 |             |             | 0.017 |
| Males                       |             | 3571 (27.8) |       |             | 3609 (28.1) |       |             | 3626 (28.2) |       |             | 3615 (28.3) |       |
| Females                     | 754 (28.7)  | 9275 (72.2) |       | 764 (29.0)  | 9235 (71.9) |       | 764 (29.0)  | 9226 (71.8) |       | 760 (29.1)  | 9171 (71.7) |       |
| <b>HFRS, n (%)</b>          |             |             | 0.001 |             |             | 0.005 |             |             | 0.031 |             |             | 0.020 |
| <5                          | 1447 (55.0) | 7062 (55.0) |       | 1183 (54.7) | 7062 (55.0) |       | 1433 (54.5) | 7198 (56.0) |       | 1434 (54.4) | 7085 (55.4) |       |
| ≥5                          | 1183 (45.0) | 5784 (45.0) |       | 1191 (45.3) | 5782 (45.0) | 0.005 | 1197 (45.5) | 5654 (44.0) | 0.031 | 1192 (45.6) | 5701 (44.6) | 0.020 |
| <b>Comorbidities, n (%)</b> |             |             |       |             |             |       |             |             |       |             |             |       |
| Anxiety                     | 210 (8.0)   | 977 (7.6)   | 0.014 | 209 (7.9)   | 1040 (8.1)  | 0.006 | 212 (8.1)   | 1033 (8.0)  | 0.001 | 206 (7.9)   | 997 (7.8)   | 0.003 |
| Arthritis                   |             | 2717 (21.2) |       |             | 2686 (20.9) |       |             | 2718 (21.1) |       |             | 2646 (20.7) |       |
| Alcohol use disorder        | 538 (20.5)  | 476 (3.7)   | 0.017 | 546 (20.7)  | 439 (3.4)   | 0.004 | 544 (20.7)  | 456 (3.5)   | 0.011 | 542 (20.7)  | 458 (3.6)   | 0.019 |
| Cancer                      | 100 (3.8)   | 2541 (19.8) | 0.005 | 102 (3.9)   | 2502 (19.5) | 0.024 | 103 (3.9)   | 2633 (20.5) | 0.019 | 103 (3.9)   | 2560 (20.0) | 0.018 |
| Cardiovascular disease      | 506 (19.2)  | 8365 (65.1) | 0.014 | 514 (19.5)  | 8338 (64.9) | 0.001 | 507 (19.3)  | 8302 (64.6) | 0.030 | 505 (19.3)  | 8297 (64.9) | 0.011 |
| Cerebrovascular disease     | 1679 (63.8) | 1393 (10.8) | 0.027 | 1686 (64.1) | 1376 (10.7) | 0.018 | 1688 (64.2) | 1334 (10.4) | 0.009 | 1683 (64.4) | 1290 (10.1) | 0.017 |
| Chronic kidney disease      | 276 (10.5)  | 4170 (32.5) | 0.011 | 275 (10.4)  | 4203 (32.7) | 0.009 | 276 (10.5)  | 4153 (32.3) | 0.004 | 277 (10.6)  | 4199 (32.8) | 0.038 |
| COPD/ asthma                | 806 (30.6)  | 1795 (14.0) | 0.039 | 816 (31.0)  | 1848 (14.4) | 0.037 | 820 (31.2)  | 1815 (14.1) | 0.024 | 813 (31.1)  | 1872 (14.6) | 0.003 |
| Delirium                    | 375 (14.3)  | 2116 (16.5) | 0.008 | 378 (14.4)  | 2176 (16.9) | 0.001 | 383 (14.6)  | 2104 (16.4) | 0.013 | 380 (14.5)  | 2119 (16.6) | 0.003 |
|                             | 421 (16.0)  |             | 0.013 | 422 (16.0)  |             | 0.024 | 426 (16.2)  |             | 0.005 | 426 (16.3)  |             | 0.008 |

|                                         |            |             |       |            |             |       |            |             |        |            |             |        |
|-----------------------------------------|------------|-------------|-------|------------|-------------|-------|------------|-------------|--------|------------|-------------|--------|
| Dementia                                | 109 (4.1)  | 599 (4.7)   | 0.025 | 111 (4.2)  | 675 (5.3)   | 0.049 | 114 (4.3)  | 595 (4.6)   | 0.014  | 112 (4.3)  | 611 (4.8)   | 0.024  |
| Depression or other affective disorders | 176 (6.7)  | 874 (6.8)   | 0.004 | 175 (6.6)  | 897 (7.0)   | 0.013 | 177 (6.7)  | 902 (7.0)   | 0.011  | 179 (6.8)  | 874 (6.8)   | <0.001 |
| Diabetes mellitus                       | 698 (26.5) | 3425 (26.7) | 0.003 | 695 (26.4) | 3495 (27.2) | 0.018 | 700 (26.6) | 3419 (26.6) | <0.001 | 704 (26.9) | 3534 (27.6) | 0.016  |
| Epilepsy/seizures                       | 78 (3.0)   | 312 (2.4)   | 0.033 | 77 (2.9)   | 356 (2.8)   | 0.009 | 76 (2.9)   | 357 (2.8)   | 0.007  | 74 (2.8)   | 329 (2.6)   | 0.016  |
| Fall                                    | 877 (33.3) | 4385 (34.1) | 0.017 | 878 (33.4) | 4418 (34.4) | 0.022 | 884 (33.6) | 4392 (34.2) | 0.012  | 887 (33.9) | 4444 (34.8) | 0.018  |
| Gastroesophageal reflux disease         | 261 (9.9)  | 1231 (9.6)  | 0.012 | 261 (9.9)  | 1191 (9.3)  | 0.022 | 262 (10.0) | 1253 (9.7)  | 0.007  | 260 (9.9)  | 1213 (9.5)  | 0.015  |
| Osteoporosis                            | 778 (29.6) | 3753 (29.2) | 0.008 | 780 (29.6) | 3747 (29.2) | 0.010 | 776 (29.5) | 3878 (30.2) | 0.015  | 773 (29.6) | 3803 (29.7) | 0.004  |
| Peptic ulcer disease                    | 99 (3.8)   | 451 (3.5)   | 0.014 | 99 (3.8)   | 452 (3.5)   | 0.013 | 98 (3.7)   | 419 (3.3)   | 0.025  | 98 (3.7)   | 444 (3.5)   | 0.015  |
| Previous vertebral fracture             | 158 (6.0)  | 894 (7.0)   | 0.039 | 161 (6.1)  | 872 (6.8)   | 0.027 | 164 (6.2)  | 859 (6.7)   | 0.018  | 164 (6.3)  | 928 (7.3)   | 0.039  |
| Visual disturbances and blindness       | 89 (3.4)   | 464 (3.6)   | 0.012 | 90 (3.4)   | 411 (3.2)   | 0.012 | 90 (3.4)   | 451 (3.5)   | 0.005  | 90 (3.4)   | 418 (3.3)   | 0.010  |

**Abbreviations:** COPD, chronic obstructive pulmonary disease; SMD, standardized mean difference

**eTable 4.** Characteristics of patients included and matched future-case controls for sensitivity analyses with exposure assessment period (index and reference periods) of 30 days and washout periods of 30, 60, and 90 days.

| Washout period                          | 30 days     |             |       | 60 days     |             |       | 90 days     |             |       |
|-----------------------------------------|-------------|-------------|-------|-------------|-------------|-------|-------------|-------------|-------|
|                                         | Cases       | Controls    | SMD   | Cases       | Controls    | SMD   | Cases       | Controls    | SMD   |
| <b>Total, n</b>                         | 2660        | 12980       |       | 2643        | 12909       |       | 2649        | 12930       |       |
| <b>Age, n (%)</b>                       |             |             | 0.043 |             |             | 0.04  |             |             | 0.039 |
| 50-59                                   | 113 (4.2)   | 446 (3.4)   |       | 114 (4.3)   | 457 (3.5)   |       | 108 (4.1)   | 434 (3.4)   |       |
| 60-69                                   | 291 (10.9)  | 1413 (10.9) |       | 285 (10.8)  | 1379 (10.7) |       | 289 (10.9)  | 1399 (10.8) |       |
| 70-79                                   | 674 (25.3)  | 3283 (25.3) |       | 666 (25.2)  | 3264 (25.3) |       | 671 (25.3)  | 3262 (25.2) |       |
| 80-84                                   | 535 (20.1)  | 2652 (20.4) |       | 534 (20.2)  | 2647 (20.5) |       | 530 (20.0)  | 2629 (20.3) |       |
| 85+                                     | 1047 (39.4) | 5186 (40.0) |       | 1044 (39.5) | 5162 (40.0) |       | 1051 (39.7) | 5206 (40.3) |       |
| <b>Sex, n (%)</b>                       |             |             | 0.02  |             |             | 0.018 |             |             | 0.019 |
| Males                                   | 769 (28.9)  | 3636 (28.0) |       | 763 (28.9)  | 3623 (28.1) |       | 764 (28.8)  | 3621 (28.0) |       |
| Females                                 | 1891 (71.1) | 9344 (72.0) |       | 1880 (71.1) | 9286 (71.9) |       | 1885 (71.2) | 9309 (72.0) |       |
| <b>HFRS, n (%)</b>                      |             |             | 0.022 |             |             | 0.01  |             |             | 0.021 |
| <5                                      | 1470 (55.3) | 7031 (54.2) |       | 1459 (55.2) | 7190 (55.7) |       | 1451 (54.8) | 7216 (55.8) |       |
| ≥5                                      | 1190 (44.7) | 5949 (45.8) | 0.022 | 1184 (44.8) | 5719 (44.3) | 0.01  | 1198 (45.2) | 5714 (44.2) | 0.021 |
| <b>Comorbidities, n (%)</b>             |             |             |       |             |             |       |             |             |       |
| Anxiety                                 | 210 (7.9)   | 1013 (7.8)  | 0.003 | 209 (7.9)   | 1034 (8.0)  | 0.004 | 205 (7.7)   | 961 (7.4)   | 0.012 |
| Arthritis                               | 530 (19.9)  | 2631 (20.3) | 0.009 | 538 (20.4)  | 2685 (20.8) | 0.011 | 542 (20.5)  | 2721 (21.0) | 0.014 |
| Alcohol use disorder                    | 105 (3.9)   | 464 (3.6)   | 0.020 | 103 (3.9)   | 474 (3.7)   | 0.012 | 103 (3.9)   | 461 (3.6)   | 0.017 |
| Cancer                                  | 514 (19.3)  | 2577 (19.9) | 0.013 | 506 (19.1)  | 2523 (19.5) | 0.010 | 510 (19.3)  | 2594 (20.1) | 0.020 |
| Cardiovascular disease                  | 1700 (63.9) | 8490 (65.4) | 0.031 | 1683 (63.7) | 8388 (65.0) | 0.027 | 1687 (63.7) | 8315 (64.3) | 0.013 |
| Cerebrovascular disease                 | 276 (10.4)  | 1372 (10.6) | 0.006 | 274 (10.4)  | 1312 (10.2) | 0.007 | 279 (10.5)  | 1284 (9.9)  | 0.020 |
| Chronic kidney disease                  | 815 (30.6)  | 4342 (33.5) | 0.060 | 805 (30.5)  | 4254 (33.0) | 0.054 | 816 (30.8)  | 4177 (32.3) | 0.032 |
| COPD/ asthma                            | 380 (14.3)  | 1931 (14.9) | 0.017 | 372 (14.1)  | 1892 (14.7) | 0.017 | 370 (14.0)  | 1821 (14.1) | 0.003 |
| Delirium                                | 424 (15.9)  | 2168 (16.7) | 0.021 | 424 (16.0)  | 2120 (16.4) | 0.010 | 427 (16.1)  | 2142 (16.6) | 0.012 |
| Dementia                                | 111 (4.2)   | 635 (4.9)   | 0.035 | 114 (4.3)   | 645 (5.0)   | 0.032 | 116 (4.4)   | 611 (4.7)   | 0.017 |
| Depression or other affective disorders | 176 (6.6)   | 862 (6.6)   | 0.001 | 172 (6.5)   | 857 (6.6)   | 0.005 | 173 (6.5)   | 836 (6.5)   | 0.003 |
| Diabetes mellitus                       | 700 (26.3)  | 3483 (26.8) | 0.012 | 700 (26.5)  | 3555 (27.5) | 0.024 | 705 (26.6)  | 3501 (27.1) | 0.010 |
| Epilepsy/seizures                       | 80 (3.0)    | 356 (2.7)   | 0.016 | 76 (2.9)    | 326 (2.5)   | 0.022 | 79 (3.0)    | 327 (2.5)   | 0.028 |
| Fall                                    | 882 (33.2)  | 4472 (34.5) | 0.027 | 880 (33.3)  | 4358 (33.8) | 0.010 | 884 (33.4)  | 4344 (33.6) | 0.005 |
| Gastroesophageal reflux disease         | 265 (10.0)  | 1255 (9.7)  | 0.010 | 260 (9.8)   | 1250 (9.7)  | 0.005 | 262 (9.9)   | 1245 (9.6)  | 0.009 |
| Osteoporosis                            | 771 (29.0)  | 3821 (29.4) | 0.010 | 769 (29.1)  | 3738 (29.0) | 0.003 | 777 (29.3)  | 3779 (29.2) | 0.002 |
| Peptic ulcer disease                    | 103 (3.9)   | 457 (3.5)   | 0.019 | 100 (3.8)   | 416 (3.2)   | 0.031 | 100 (3.8)   | 415 (3.2)   | 0.031 |
| Previous vertebral fracture             | 166 (6.2)   | 918 (7.1)   | 0.033 | 164 (6.2)   | 863 (6.7)   | 0.020 | 156 (5.9)   | 856 (6.6)   | 0.030 |
| Visual disturbances and blindness       | 97 (3.6)    | 448 (3.5)   | 0.011 | 95 (3.6)    | 417 (3.2)   | 0.020 | 96 (3.6)    | 464 (3.6)   | 0.002 |

**Abbreviations:** COPD, chronic obstructive pulmonary disease; SMD, standardized mean difference

**eTable 5.** Characteristics of patients included and matched future-case controls for sensitivity analyses with exposure assessment period (index and reference periods) of 30 days and washout periods of 120, 150, and 180 days.

| Washout period                          | 120 days    |             |       | 150 days    |             |       | 180 days    |             |        |
|-----------------------------------------|-------------|-------------|-------|-------------|-------------|-------|-------------|-------------|--------|
|                                         | Cases       | Controls    | SMD   | Cases       | Controls    | SMD   | Cases       | Controls    | SMD    |
| <b>Total, n</b>                         | 2652        | 12959       |       | 2639        | 12901       |       | 2613        | 12774       |        |
| <b>Age, n (%)</b>                       |             |             | 0.04  |             |             | 0.041 |             |             | 0.038  |
| 50-59                                   | 107 (4.1)   | 429 (3.4)   |       | 108 (4.1)   | 431 (3.4)   |       | 109 (4.2)   | 441 (3.4)   |        |
| 60-69                                   | 281 (10.8)  | 1375 (10.8) |       | 285 (10.9)  | 1380 (10.8) |       | 286 (10.9)  | 1384 (10.8) |        |
| 70-79                                   | 662 (25.4)  | 3226 (25.3) |       | 668 (25.5)  | 3251 (25.4) |       | 657 (25.1)  | 3205 (25.0) |        |
| 80-84                                   | 524 (20.1)  | 2607 (20.4) |       | 530 (20.2)  | 2627 (20.5) |       | 532 (20.3)  | 2637 (20.6) |        |
| 85+                                     | 1037 (39.7) | 5136 (40.2) |       | 1030 (39.3) | 5106 (39.9) |       | 1037 (39.6) | 5139 (40.1) |        |
| <b>Sex, n (%)</b>                       |             |             | 0.017 |             |             | 0.020 |             |             | 0.018  |
| Males                                   | 746 (28.6)  | 3550 (27.8) |       | 755 (28.8)  | 3573 (27.9) |       | 757 (28.9)  | 3593 (28.1) |        |
| Females                                 | 1865 (71.4) | 9223 (72.2) |       | 1866 (71.2) | 9222 (72.1) |       | 1864 (71.1) | 9213 (71.9) |        |
| <b>HFRS, n (%)</b>                      |             |             | 0.016 |             |             | 0.008 |             |             | 0.019  |
| <5                                      | 1448 (55.5) | 7186 (56.3) |       | 1141 (55.0) | 7085 (55.4) |       | 1437 (54.8) | 7139 (55.7) |        |
| ≥5                                      | 1163 (44.5) | 5587 (43.7) |       | 1180 (45.0) | 5710 (44.6) |       | 1184 (45.2) | 5667 (44.3) |        |
| <b>Comorbidities, n (%)</b>             |             |             |       |             |             |       |             |             |        |
| Anxiety                                 | 205 (7.9)   | 934 (7.3)   | 0.020 | 203 (7.7)   | 970 (7.6)   | 0.006 | 206 (7.9)   | 1008 (7.9)  | <0.001 |
| Arthritis                               | 536 (20.5)  | 2696 (21.1) | 0.014 | 534 (20.4)  | 2687 (21.0) | 0.015 | 536 (20.5)  | 2664 (20.8) | 0.009  |
| Alcohol use disorder                    | 99 (3.8)    | 420 (3.3)   | 0.027 | 101 (3.9)   | 442 (3.5)   | 0.021 | 101 (3.9)   | 425 (3.3)   | 0.029  |
| Cancer                                  | 499 (19.1)  | 2539 (19.9) | 0.019 | 508 (19.4)  | 2591 (20.3) | 0.022 | 506 (19.3)  | 2543 (19.9) | 0.014  |
| Cardiovascular disease                  | 1659 (63.5) | 8178 (64.0) | 0.010 | 1675 (63.9) | 8274 (64.7) | 0.016 | 1674 (63.9) | 8250 (64.4) | 0.012  |
| Cerebrovascular disease                 | 273 (10.5)  | 1262 (9.9)  | 0.019 | 276 (10.5)  | 1363 (10.7) | 0.004 | 278 (10.6)  | 1296 (10.1) | 0.016  |
| Chronic kidney disease                  | 798 (30.6)  | 4093 (32.0) | 0.032 | 805 (30.7)  | 4164 (32.5) | 0.039 | 817 (31.2)  | 4028 (31.5) | 0.006  |
| COPD/ asthma                            | 367 (14.1)  | 1842 (14.4) | 0.010 | 368 (14.0)  | 1789 (14.0) | 0.002 | 370 (14.1)  | 1828 (14.3) | 0.005  |
| Delirium                                | 416 (15.9)  | 2050 (16.0) | 0.003 | 413 (15.8)  | 2066 (16.1) | 0.011 | 423 (16.1)  | 2085 (16.3) | 0.004  |
| Dementia                                | 110 (4.2)   | 599 (4.7)   | 0.023 | 108 (4.1)   | 580 (4.5)   | 0.020 | 114 (4.3)   | 603 (4.7)   | 0.017  |
| Depression or other affective disorders | 171 (6.5)   | 839 (6.6)   | 0.001 | 171 (6.5)   | 847 (6.6)   | 0.004 | 177 (6.8)   | 871 (6.8)   | 0.002  |
| Diabetes mellitus                       | 690 (26.4)  | 3388 (26.5) | 0.002 | 689 (26.3)  | 3479 (27.2) | 0.020 | 695 (26.5)  | 3397 (26.5) | <0.001 |
| Epilepsy/seizures                       | 74 (2.8)    | 315 (2.5)   | 0.023 | 77 (2.9)    | 327 (2.6)   | 0.023 | 77 (2.9)    | 332 (2.6)   | 0.021  |
| Fall                                    | 865 (33.1)  | 4283 (33.5) | 0.009 | 868 (33.1)  | 4368 (34.1) | 0.022 | 873 (33.3)  | 4320 (33.7) | 0.009  |
| Gastroesophageal reflux disease         | 258 (9.9)   | 1233 (9.7)  | 0.008 | 262 (10.0)  | 1202 (9.4)  | 0.020 | 262 (10.0)  | 1224 (9.6)  | 0.015  |
| Osteoporosis                            | 763 (29.2)  | 3772 (29.5) | 0.007 | 776 (29.6)  | 3831 (29.9) | 0.007 | 775 (29.6)  | 3779 (29.5) | 0.001  |
| Peptic ulcer disease                    | 101 (3.9)   | 442 (3.5)   | 0.022 | 99 (3.8)    | 438 (3.4)   | 0.019 | 99 (3.8)    | 423 (3.3)   | 0.026  |
| Previous vertebral fracture             | 151 (5.8)   | 903 (7.1)   | 0.052 | 161 (6.1)   | 887 (6.9)   | 0.032 | 161 (6.1)   | 871 (6.8)   | 0.027  |
| Visual disturbances and blindness       | 91 (3.5)    | 426 (3.3)   | 0.008 | 94 (3.6)    | 452 (3.5)   | 0.003 | 92 (3.5)    | 465 (3.6)   | 0.007  |

**Abbreviations:** COPD, chronic obstructive pulmonary disease; SMD, standardized mean difference



**eTable 6.** Characteristics of patients included and matched future-case controls for sensitivity analyses with exposure assessment period (index and reference periods) of 90 days and washout periods of 90, 120, 150, and 180 days.

| Washout period                          | 90 days     |             |        | 120 days    |             |       | 150 days    |             |       | 180 days    |             |       |
|-----------------------------------------|-------------|-------------|--------|-------------|-------------|-------|-------------|-------------|-------|-------------|-------------|-------|
|                                         | Cases       | Controls    | SMD    | Cases       | Controls    | SMD   | Cases       | Controls    | SMD   | Cases       | Controls    | SMD   |
| <b>Total, n</b>                         | 2652        | 12959       |        | 2639        | 12901       |       | 2613        | 12774       |       | 2578        | 12609       |       |
| <b>Age, n (%)</b>                       |             |             | 0.039  |             |             | 0.038 |             |             | 0.038 |             |             | 0.034 |
| 50-59                                   | 113 (4.3)   | 457 (3.5)   |        | 112 (4.2)   | 454 (3.5)   |       | 111 (4.2)   | 451 (3.5)   |       | 109 (4.2)   | 452 (3.6)   |       |
| 60-69                                   | 288 (10.9)  | 1394 (10.8) |        | 285 (10.8)  | 1382 (10.7) |       | 286 (10.9)  | 1387 (10.9) |       | 282 (10.9)  | 1367 (10.8) |       |
| 70-79                                   | 656 (24.7)  | 3202 (24.7) |        | 655 (24.8)  | 3199 (24.8) |       | 646 (24.7)  | 3155 (24.7) |       | 639 (24.8)  | 3119 (24.7) |       |
| 80-84                                   | 540 (20.4)  | 2677 (20.7) |        | 541 (20.5)  | 2682 (20.8) |       | 540 (20.7)  | 2677 (21.0) |       | 533 (20.7)  | 2642 (21.0) |       |
| 85+                                     | 1055 (39.8) | 5229 (40.4) |        | 1046 (39.6) | 5184 (40.2) |       | 1030 (39.4) | 5104 (40.0) |       | 1015 (39.4) | 5029 (39.9) |       |
| <b>Sex, n (%)</b>                       |             |             | 0.018  |             |             | 0.018 |             |             | 0.017 |             |             | 0.017 |
| Males                                   | 765 (28.8)  | 3631 (28.0) |        | 761 (28.8)  | 3615 (28.0) |       | 759 (29.0)  | 3610 (28.3) |       | 749 (29.1)  | 3564 (28.3) |       |
| Females                                 | 1887 (71.2) | 9328 (72.0) |        | 1878 (71.2) | 9286 (72.0) |       | 1854 (71.0) | 9164 (71.7) |       | 1829 (70.9) | 9045 (71.7) |       |
| <b>HFRS, n (%)</b>                      |             |             | 0.009  |             |             | 0.001 |             |             | 0.019 |             |             | 0.026 |
| <5                                      | 1436 (54.1) | 7067 (54.6) |        | 1426 (54.0) | 6964 (54.0) |       | 1410 (54.0) | 7017 (54.9) |       | 1392 (54.0) | 6970 (55.3) |       |
| ≥5                                      | 1216 (45.9) | 5883 (45.4) |        | 1213 (46.0) | 5937 (46.0) |       | 1203 (46.0) | 5757 (45.1) |       | 1186 (46.0) | 5639 (44.7) |       |
| <b>Comorbidities, n (%)</b>             |             |             |        |             |             |       |             |             |       |             |             |       |
| Anxiety                                 | 212 (8.0)   | 1004 (7.7)  | 0.009  | 211 (8.0)   | 990 (7.7)   | 0.012 | 203 (7.8)   | 995 (7.8)   | 0.001 | 199 (7.7)   | 975 (7.7)   | 0.001 |
| Arthritis                               | 553 (20.9)  | 2747 (21.2) | 0.008  | 554 (21.0)  | 2664 (20.6) | 0.008 | 544 (20.8)  | 2702 (21.2) | 0.008 | 538 (20.9)  | 2709 (21.5) | 0.015 |
| Alcohol use disorder                    | 102 (3.8)   | 465 (3.6)   | 0.014  | 103 (3.9)   | 452 (3.5)   | 0.021 | 102 (3.9)   | 463 (3.6)   | 0.015 | 98 (3.8)    | 433 (3.4)   | 0.020 |
| Cancer                                  | 519 (19.6)  | 2627 (20.3) | 0.018  | 517 (19.6)  | 2581 (20.0) | 0.010 | 513 (19.6)  | 2533 (19.8) | 0.005 | 504 (19.6)  | 2492 (19.8) | 0.005 |
| Cardiovascular disease                  | 1705 (64.3) | 8459 (65.3) | 0.021  | 1696 (64.3) | 8400 (65.1) | 0.018 | 1681 (64.3) | 8256 (64.6) | 0.006 | 1655 (64.2) | 8123 (64.4) | 0.005 |
| Cerebrovascular disease                 | 273 (10.3)  | 1332 (10.3) | 0.001  | 273 (10.3)  | 1343 (10.4) | 0.002 | 273 (10.4)  | 1324 (10.4) | 0.003 | 270 (10.5)  | 1251 (9.9)  | 0.018 |
| Chronic kidney disease                  | 827 (31.2)  | 4228 (32.6) | 0.031  | 824 (31.2)  | 4317 (33.5) | 0.048 | 822 (31.5)  | 4152 (32.5) | 0.022 | 812 (31.5)  | 4191 (33.2) | 0.037 |
| COPD/ asthma                            | 382 (14.4)  | 1862 (14.4) | 0.001  | 385 (14.6)  | 1874 (14.5) | 0.002 | 382 (14.6)  | 1840 (14.4) | 0.006 | 375 (14.5)  | 1789 (14.2) | 0.010 |
| Delirium                                | 424 (16.0)  | 2166 (16.7) | 0.020  | 421 (16.0)  | 2209 (17.1) | 0.031 | 418 (16.0)  | 2142 (16.8) | 0.021 | 414 (16.1)  | 2090 (16.6) | 0.014 |
| Dementia                                | 113 (4.3)   | 614 (4.7)   | 0.023  | 113 (4.3)   | 635 (4.9)   | 0.031 | 113 (4.3)   | 597 (4.7)   | 0.017 | 115 (4.5)   | 575 (4.6)   | 0.005 |
| Depression or other affective disorders | 178 (6.7)   | 930 (7.2)   | 0.018  | 182 (6.9)   | 916 (7.1)   | 0.008 | 176 (6.7)   | 949 (7.4)   | 0.027 | 178 (6.9)   | 906 (7.2)   | 0.011 |
| Diabetes mellitus                       | 707 (26.7)  | 3513 (27.1) | 0.010  | 711 (26.9)  | 3591 (27.8) | 0.020 | 710 (27.2)  | 3421 (26.8) | 0.009 | 705 (27.3)  | 3465 (27.5) | 0.003 |
| Epilepsy/seizures                       | 77 (2.9)    | 357 (2.8)   | 0.009  | 76 (2.9)    | 375 (2.9)   | 0.002 | 74 (2.8)    | 340 (2.7)   | 0.010 | 76 (2.9)    | 329 (2.6)   | 0.021 |
| Fall                                    | 895 (33.7)  | 4431 (34.2) | 0.009  | 898 (34.0)  | 4538 (35.2) | 0.024 | 887 (33.9)  | 4411 (34.5) | 0.012 | 866 (33.6)  | 4250 (33.7) | 0.002 |
| Gastroesophageal reflux disease         | 264 (10.0)  | 1226 (9.5)  | 0.017  | 263 (10.0)  | 1198 (9.3)  | 0.023 | 259 (9.9)   | 1235 (9.7)  | 0.008 | 256 (9.9)   | 1261 (10.0) | 0.002 |
| Osteoporosis                            | 788 (29.7)  | 3853 (29.7) | <0.001 | 785 (29.7)  | 3882 (30.1) | 0.008 | 779 (29.8)  | 3790 (29.7) | 0.003 | 762 (29.6)  | 3747 (29.7) | 0.003 |
| Peptic ulcer disease                    | 101 (3.8)   | 431 (3.3)   | 0.026  | 99 (3.8)    | 417 (3.2)   | 0.028 | 97 (3.7)    | 425 (3.3)   | 0.021 | 95 (3.7)    | 430 (3.4)   | 0.015 |

|                                   |           |           |       |           |           |       |           |           |       |           |           |       |
|-----------------------------------|-----------|-----------|-------|-----------|-----------|-------|-----------|-----------|-------|-----------|-----------|-------|
| Previous vertebral fracture       | 169 (6.4) | 954 (7.4) | 0.039 | 169 (6.4) | 922 (7.1) | 0.030 | 168 (6.4) | 888 (7.0) | 0.021 | 163 (6.3) | 881 (7.0) | 0.027 |
| Visual disturbances and blindness | 91 (3.4)  | 466 (3.6) | 0.009 | 93 (3.5)  | 473 (3.7) | 0.008 | 92 (3.5)  | 446 (3.5) | 0.002 | 93 (3.6)  | 436 (3.5) | 0.008 |

**Abbreviations:** COPD, chronic obstructive pulmonary disease; SMD, standardized mean difference

**eTable 7.** Results of case-case-time-control analyses for sensitivity analyses.

| Exposure assessment period                   | 60 days           |                       |                     | 30 days           |                       |                     | 90 days           |                       |                     |
|----------------------------------------------|-------------------|-----------------------|---------------------|-------------------|-----------------------|---------------------|-------------------|-----------------------|---------------------|
|                                              | Index period only | Reference period only | Odds ratio (95% CI) | Index period only | Reference period only | Odds ratio (95% CI) | Index period only | Reference period only | Odds ratio (95% CI) |
| <b>Washout period: 30 days</b>               |                   |                       |                     |                   |                       |                     |                   |                       |                     |
| Case crossover                               |                   |                       |                     | 362               | 197                   | 1.88 [1.58-2.24]    |                   |                       |                     |
| Control crossover                            |                   |                       |                     | 880               | 686                   | 1.32 [1.20-1.45]    |                   |                       |                     |
| Case-case-time-control                       |                   |                       |                     | N.A.              | N.A.                  | 1.42 [1.17-1.74]    |                   |                       |                     |
| Adjusted case-case-time-control <sup>a</sup> |                   |                       |                     | N.A.              | N.A.                  | 1.40 [1.15-1.71]    |                   |                       |                     |
| <b>Washout period: 60 days</b>               |                   |                       |                     |                   |                       |                     |                   |                       |                     |
| Case crossover                               |                   |                       |                     | 416               | 232                   | 1.79 [1.53-2.11]    | 467               | 235                   | 1.99 [1.70-2.32]    |
| Control crossover                            |                   |                       |                     | 1010              | 860                   | 1.17 [1.07-1.29]    | 1472              | 1089                  | 1.35 [1.25-1.46]    |
| Case-case-time-control                       |                   |                       |                     | N.A.              | N.A.                  | 1.53 [1.27-1.84]    | N.A.              | N.A.                  | 1.47 [1.23-1.75]    |
| Adjusted case-case-time-control <sup>a</sup> |                   |                       |                     | N.A.              | N.A.                  | 1.50 [1.24-1.80]    | N.A.              | N.A.                  | 1.43 [1.20-1.70]    |
| <b>Washout period: 90 days</b>               |                   |                       |                     |                   |                       |                     |                   |                       |                     |
| Case crossover                               | 459               | 224                   | 2.05 [1.75-2.40]    | 426               | 227                   | 1.88 [1.60-2.20]    | 508               | 261                   | 1.95 [1.68-2.26]    |
| Control crossover                            | 1496              | 1076                  | 1.39 [1.29-1.50]    | 1255              | 1005                  | 1.25 [1.15-1.36]    | 1805              | 1386                  | 1.30 [1.21-1.40]    |
| Case-case-time-control                       | N.A.              | N.A.                  | 1.47 [1.23-1.76]    | N.A.              | N.A.                  | 1.50 [1.25-1.80]    | N.A.              | N.A.                  | 1.49 [1.27-1.76]    |
| Adjusted case-case-time-control <sup>a</sup> | N.A.              | N.A.                  | 1.42 [1.19-1.70]    | N.A.              | N.A.                  | 1.46 [1.22-1.75]    | N.A.              | N.A.                  | 1.45 [1.23-1.72]    |
| <b>Washout period: 120 days</b>              |                   |                       |                     |                   |                       |                     |                   |                       |                     |
| Case crossover                               | 485               | 238                   | 2.04 [1.75-2.38]    | 484               | 228                   | 2.12 [1.81-2.48]    | 540               | 263                   | 2.05 [1.77-2.38]    |
| Control crossover                            | 1697              | 1305                  | 1.30 [1.21-1.40]    | 1402              | 976                   | 1.44 [1.32-1.56]    | 2109              | 1326                  | 1.59 [1.48-1.70]    |
| Case-case-time-control                       | N.A.              | N.A.                  | 1.57 [1.32-1.86]    | N.A.              | N.A.                  | 1.48 [1.24-1.76]    | N.A.              | N.A.                  | 1.29 [1.10-1.52]    |
| Adjusted case-case-time-control <sup>a</sup> | N.A.              | N.A.                  | 1.53 [1.28-1.81]    | N.A.              | N.A.                  | 1.44 [1.21-1.72]    | N.A.              | N.A.                  | 1.26 [1.06-1.48]    |
| <b>Washout period: 150 days</b>              |                   |                       |                     |                   |                       |                     |                   |                       |                     |
| Case crossover                               | 522               | 258                   | 2.02 [1.74-2.35]    | 494               | 239                   | 2.07 [1.77-2.41]    | 556               | 268                   | 2.07 [1.79-2.4]     |
| Control crossover                            | 1895              | 1413                  | 1.34 [1.25-1.44]    | 1679              | 1213                  | 1.38 [1.29-1.49]    | 2341              | 1626                  | 1.44 [1.35-1.53]    |
| Case-case-time-control                       | N.A.              | N.A.                  | 1.51 [1.28-1.78]    | N.A.              | N.A.                  | 1.49 [1.26-1.77]    | N.A.              | N.A.                  | 1.44 [1.23-1.69]    |
| Adjusted case-case-time-control <sup>a</sup> | N.A.              | N.A.                  | 1.46 [1.24-1.73]    | N.A.              | N.A.                  | 1.43 [1.21-1.70]    | N.A.              | N.A.                  | 1.40 [1.19-1.64]    |
| <b>Washout period: 180 days</b>              |                   |                       |                     |                   |                       |                     |                   |                       |                     |
| Case crossover                               | 549               | 258                   | 2.13 [1.84-2.47]    | 514               | 243                   | 2.12 [1.82-2.46]    | 580               | 267                   | 2.17 [1.88-2.51]    |
| Control crossover                            | 2160              | 1431                  | 1.51 [1.41-1.61]    | 1738              | 1320                  | 1.32 [1.23-1.41]    | 2296              | 1565                  | 1.47 [1.38-1.56]    |
| Case-case-time-control                       | N.A.              | N.A.                  | 1.41 [1.20-1.66]    | N.A.              | N.A.                  | 1.61 [1.36-1.90]    | N.A.              | N.A.                  | 1.48 [1.26-1.74]    |
| Adjusted case-case-time-control <sup>a</sup> | N.A.              | N.A.                  | 1.37 [1.16-1.61]    | N.A.              | N.A.                  | 1.57 [1.32-1.86]    | N.A.              | N.A.                  | 1.45 [1.23-1.70]    |

**Abbreviations:** CI, confidence interval; CKD, chronic kidney disease; HFRS, Hospital Frailty Risk Score. <sup>a</sup>Adjusted for time-vary exposure to antidepressants, antipsychotics, benzodiazepines and opioids.
