# Supplementary material for: Gabapentinoids and Risk of Hip Fracture
Source: PubMed Central journal article supplement (PMC11561685; doi:10.1001/jamanetworkopen.2024.44488), 2024-11-13
Supplement: jamanetwopen-e2444488-s002.pdf [file jamanetwopen-e2444488-s002.pdf]

## Data Sharing Statement

Leung. Gabapentinoids and Risk of Hip Fracture. *JAMA Netw Open*. Published November 13, 2024. doi:10.1001/jamanetworkopen.2024.44488

### Data

**Data available:** No
